# Supplementary material for: Impact of Sex in the Efficacy of Perioperative Desensitization Procedures in Heart Transplantation: A Retrospective Cohort Study
Source: PubMed Central journal article supplement (PMC8292826; doi:10.3389/fimmu.2021.659303), 2021-07-07

Additional Table. Cumulative preformed donor-specific anti-HLA antibodies on day 0 (in mean immunofluorescence units)

| Control | Desensitized |
|---------|--------------|
| 4984    | 1822         |
| 2955    | 9035         |
| 6669    | 1768         |
| 1089    | 3162         |
| 1005    | 3463         |
| 1153    | 4978         |
| 1788    | 38922        |
| 41620   | 4809         |
| 2616    | 15676        |
| 1785    | 4866         |
| 17984   | 3820         |
| 1600    | 11183        |
| 4027    | 7483         |
| 23263   | 32530        |
| 9480    | 21657        |
| 8725    | 4113         |
| 2589    | 1550         |
| 2180    | 23469        |
| 83836   | 1308         |
| 4027    | 3614         |
| 4026    | 1534         |
| 6525    | 2724         |
| 1164    | 15470        |
| 25835   | 6010         |
| 3004    | 3483         |
| 1397    | 12982        |
| 1943    | 4560         |
| 13938   | 16450        |
| 1865    | 16429        |
| 6054    | 1967         |
| 8576    | 1180         |
|         | 13392        |
|         | 4034         |
|         | 17145        |
|         | 3882         |
|         | 2276         |
|         | 3972         |

Additional Figure. Bar chart representing the proportion of patients who developed the composite outcome during the 5-years follow-up, depending on the number cumulative preformed donor-specific anti-HLA antibodies mean immunofluorescence units.

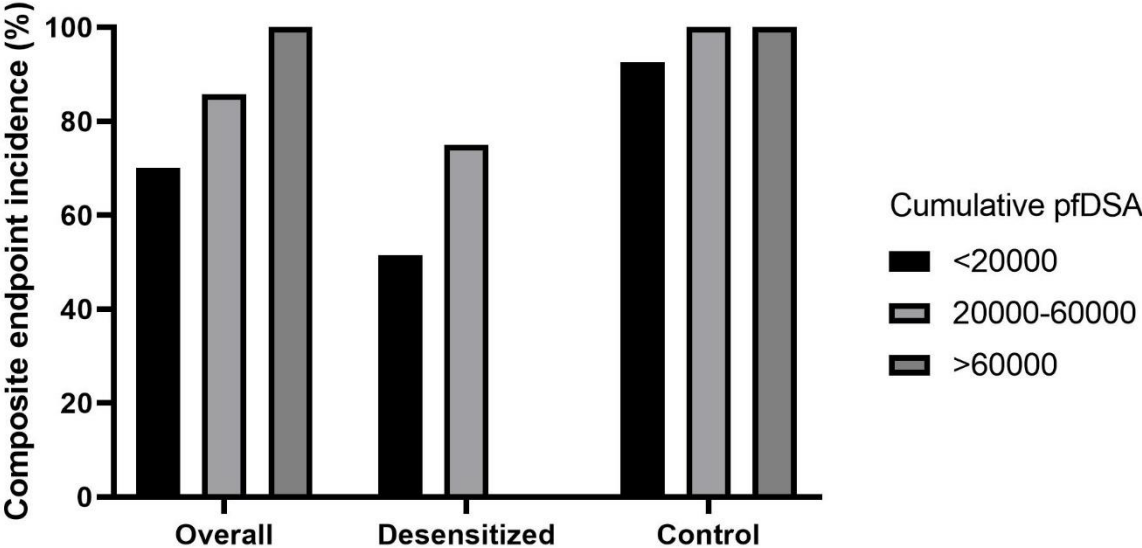

Supplement: DataSheet_1.pdf [file DataSheet_1.pdf]
